# Supplementary material for: Juicebox.js Provides a Cloud-Based Visualization System for Hi-C Data
Source: Cell Syst. Author manuscript; Available in PMC 2018 Jul 16. (PMC6047755; doi:10.1016/j.cels.2018.01.001)
Supplement: supplement [file NIHMS949176-supplement.pdf]

**Cell Systems, Volume 6**

## **Supplemental Information**

### **Juicebox.js Provides a Cloud-Based Visualization System for Hi-C Data**

**James T. Robinson, Douglass Turner, Neva C. Durand, Helga Thorvaldsdóttir, Jill P. Mesirov, and Erez Lieberman Aiden**

**Table S1. Interactive Figures from Rao et al., Cell 2017, "Cohesin Loss Eliminates All Loop Domains". Related to Figure 1.**

| Figure # | Figure Title                                                                                                                                 | URL                                                                                         |
|----------|----------------------------------------------------------------------------------------------------------------------------------------------|---------------------------------------------------------------------------------------------|
| Figure 2 | Cohesin Degradation Eliminates Loop Domains.                                                                                                 | <a href="http://www.cell.com/cell/9802-figure-2">http://www.cell.com/cell/9802-figure-2</a> |
| Figure 3 | Genome Compartmentalization Is Strengthened after Cohesin Degradation                                                                        | <a href="http://www.cell.com/cell/9802-figure-3">http://www.cell.com/cell/9802-figure-3</a> |
| Figure 4 | Cohesin Loss Causes Superenhancers to Co-localize, Forming Hundreds of Links within and across Chromosomes                                   | <a href="http://www.cell.com/cell/9802-figure-4">http://www.cell.com/cell/9802-figure-4</a> |
| Figure 5 | In the Absence of Cohesin, a Clique Spanning More Than 20 Superenhancers Forms Pairwise Links and Higher-Order Hubs                          | <a href="http://www.cell.com/cell/9802-figure-5">http://www.cell.com/cell/9802-figure-5</a> |
| Figure 6 | Molecular Dynamics Simulations Combining Extrusion and Compartmentalization Can Recapitulate Hi-C Experimental Results                       | <a href="http://www.cell.com/cell/9802-figure-6">http://www.cell.com/cell/9802-figure-6</a> |
| Figure 7 | Cohesin Degradation Results in Strong Down-Regulation of Genes near Superenhancers but Does Not Result in Widespread Ectopic Gene Activation | <a href="http://www.cell.com/cell/9802-figure-7">http://www.cell.com/cell/9802-figure-7</a> |
